# Supplementary material for: Protective effects of selenium-enriched peptides from Cardamine violifolia against high-fat diet induced obesity and its associated metabolic disorders in mice
Source: Royal Society of Chemistry journal article supplement (doi:10.1039/d0ra04209a), 2020-01-01
Supplement: d0ra04209a1.pdf [file d0ra04209a1.pdf]

**Table S1** The composition of the diets (per 100g).

| Diet                         | High fat diet | Normal chow diet |
|------------------------------|---------------|------------------|
| Carbohydrate (g)             | 26.4          | 63.5             |
| Protein (g)                  | 24.7          | 17.4             |
| Fat (g)                      | 34.1          | 4.0              |
| Energy (kcal/g)              | 5.1           | 3.6              |
| Energy from carbohydrate (%) | 20.6          | 70.6             |
| Energy from protein (%)      | 19.4          | 19.4             |
| Energy from fat (%)          | 60.0          | 10.0             |

**Table S2** The primer sequences of the related gene in quantified by RT-qPCR.

| Target Name    |   | Primer                  |
|----------------|---|-------------------------|
| $\beta$ -actin | F | CTCCTGAGCGCAAGTACTCT    |
|                | R | TACTCCTGCTTGCTGATCCAC   |
| GPX            | F | AGCCAGCTACTGAGGTCTGA    |
|                | R | CAGCATTTAGGAGGCAAGCA    |
| PPAR- $\alpha$ | F | ATGAACAAAGACGGGATGCT    |
|                | R | CTTGGGTTCCATGATGTCACAG  |
| PPAR- $\gamma$ | F | TTCTGGCCCACTTTCG        |
|                | R | AAATGCTGGAGAAATCAACTGTG |
| SREBP-1c       | F | CTATGGAGGGCATGAAACCCGAA |
|                | R | CGGGCTCAGAGTCACTACCAC   |
| ACAT           | F | AAGTCTACATGGGCAATGTCA   |
|                | R | TCATTCCTGAAGCACAAACCTT  |
| FAB4           | F | GGGATGGAAAGTCGACCACA    |
|                | R | AAGTCACGCCTTTCATAACACA  |
| FAS            | F | ACTAATAGCATCTCCGAGAGT   |
|                | R | GGGCCTCCTTGATATAATCCTT  |
| PGC-1 $\alpha$ | F | TCATCACCTACCGTTACACC    |
|                | R | AAGTCAGTTTCGTTTCGACC    |
| LPL            | F | AGATGCCCTACAAAGTGTTCC   |
|                | R | GTGCCGTACAGAGAAATCTCG   |
| HMGR           | F | GCTGGAATTATGAGTGCCCTA   |
|                | R | TACCCAGAATGTACTTGGACCC  |
| LCAT           | F | GTAACCACACACGGCCTGTC    |
|                | R | GTCTTACGGTAGCACATCCAGT  |
| UCP1           | F | TGCCAGGACAGTACCCAAG     |
|                | R | AAAAGAAGCCACAAACCTT     |
| ZO-1           | F | GACGAAGAAGTGCATGACCC    |
|                | R | GCTTGCACTCCTATCCCTT     |
| occludin       | F | ATAATGGGAGTGAACCCGAC    |

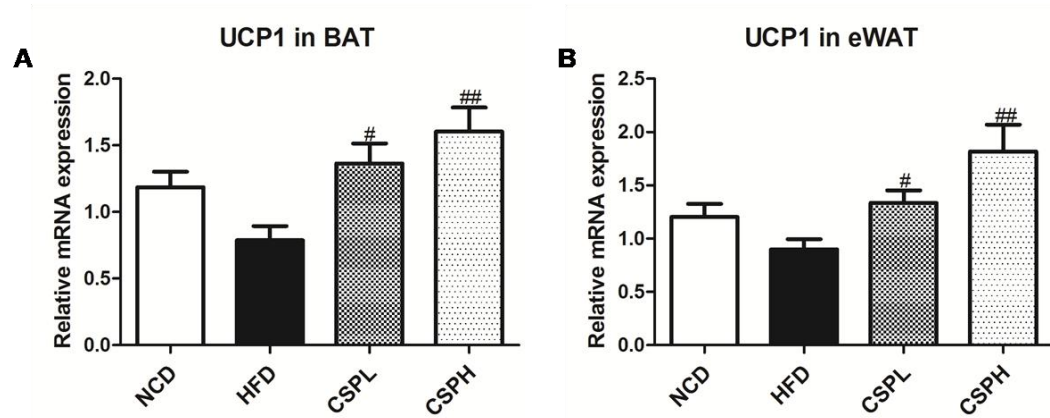

**Fig S1.** CSP supplementation upregulated the gene expression of UCP1 in BAT and eWAT. (A) UCP1 in BAT; (B) UCP1 in eWAT. Data are expressed as the mean  $\pm$  SEM (n=6). #  $P < 0.05$ , ##  $p < 0.01$ , ###  $p < 0.001$  compared with HFD.

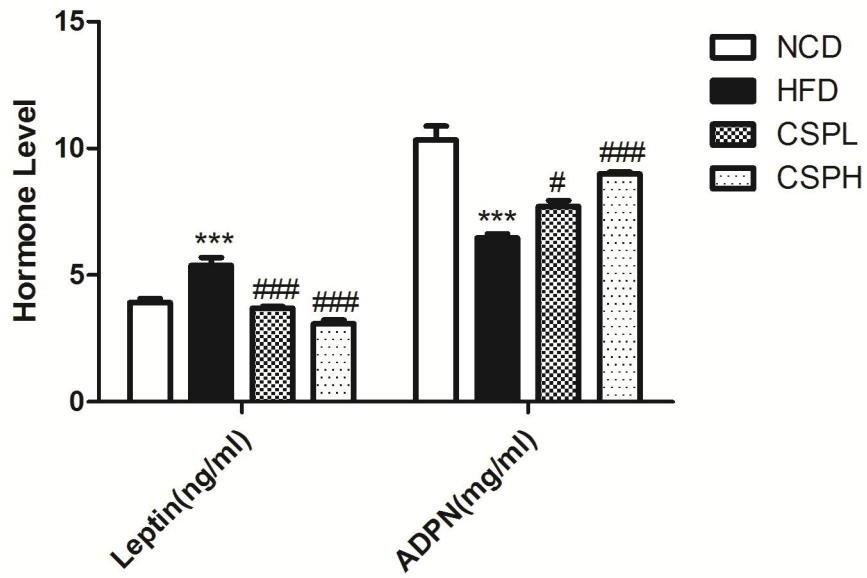

**Fig S2.** CSP supplementation ameliorated serum hormone level of leptin and ADPN in HFD-fed mice. Data are expressed as the mean  $\pm$  SEM (n=6). \*  $P < 0.05$ , \*\*  $P < 0.01$ , \*\*\*  $P < 0.001$  compared with NCD; #  $P < 0.05$ , ##  $p < 0.01$ , ###  $p < 0.001$  compared with HFD.

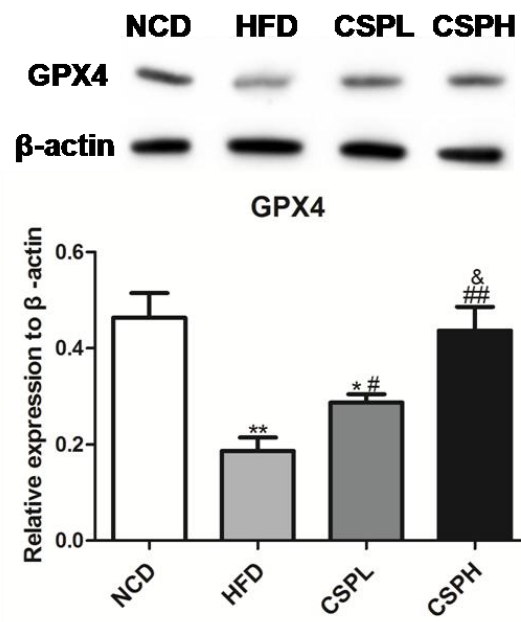

Fig S3. CSP supplementation enhanced the protein level of selenoenzyme-GPX4 in liver. Data are expressed as the mean  $\pm$  SEM (n=4). \*  $P < 0.05$ , \*\*  $P < 0.01$ , compared with NCD; #  $P < 0.05$ , ##  $p < 0.01$ , compared with HFD; &  $p < 0.05$  compared with CSPL

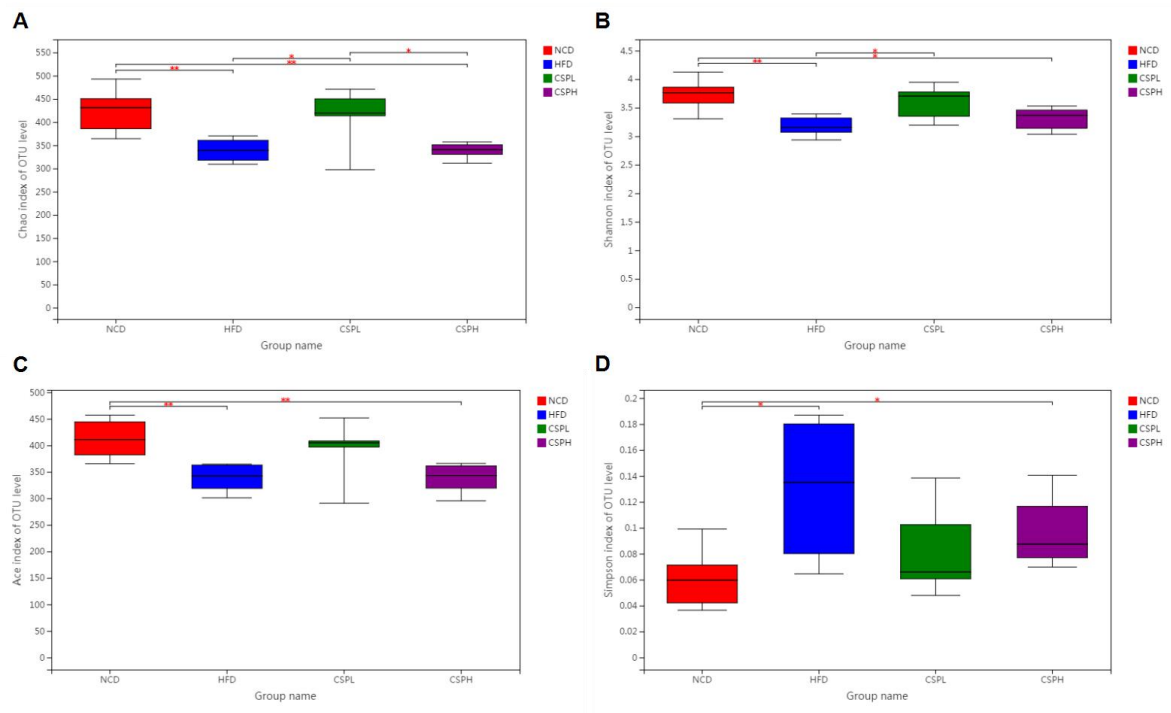

**Fig S4.** Effect of CSP on alpha diversity of gut microbiota in normal mice and inobesity mice without or with CSP treatment. (A–D) Alpha diversity was evaluated by (A) Chao1 index; (B) Shannon index; (C) Ace index, (C) Simpson index. Data are presented as mean  $\pm$  SD. Differences were analyzed by student's T-test. and denoted as follows: \*  $P < 0.05$ , \*\*  $P < 0.01$ , \*\*\*  $P < 0.001$ .

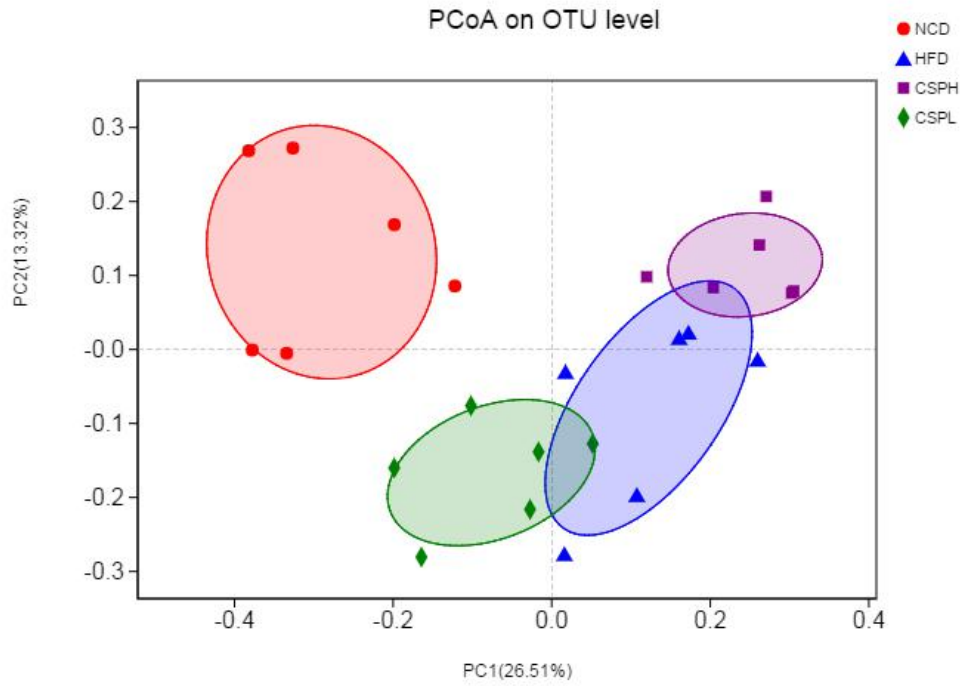

**Fig S5.** Principal coordinate analysis (PCoA) on OTU level based on Bray-Curtis dissimilarity.

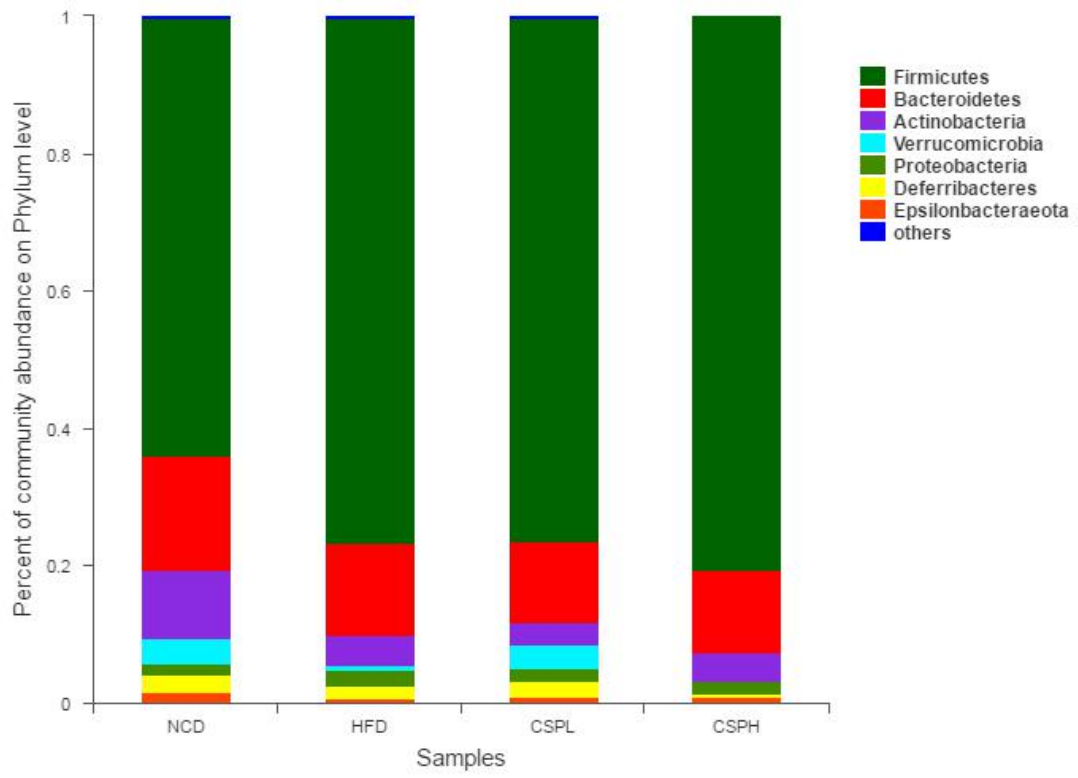

**Fig S6.**The relative abundance of gut microbiota at the phylum level.



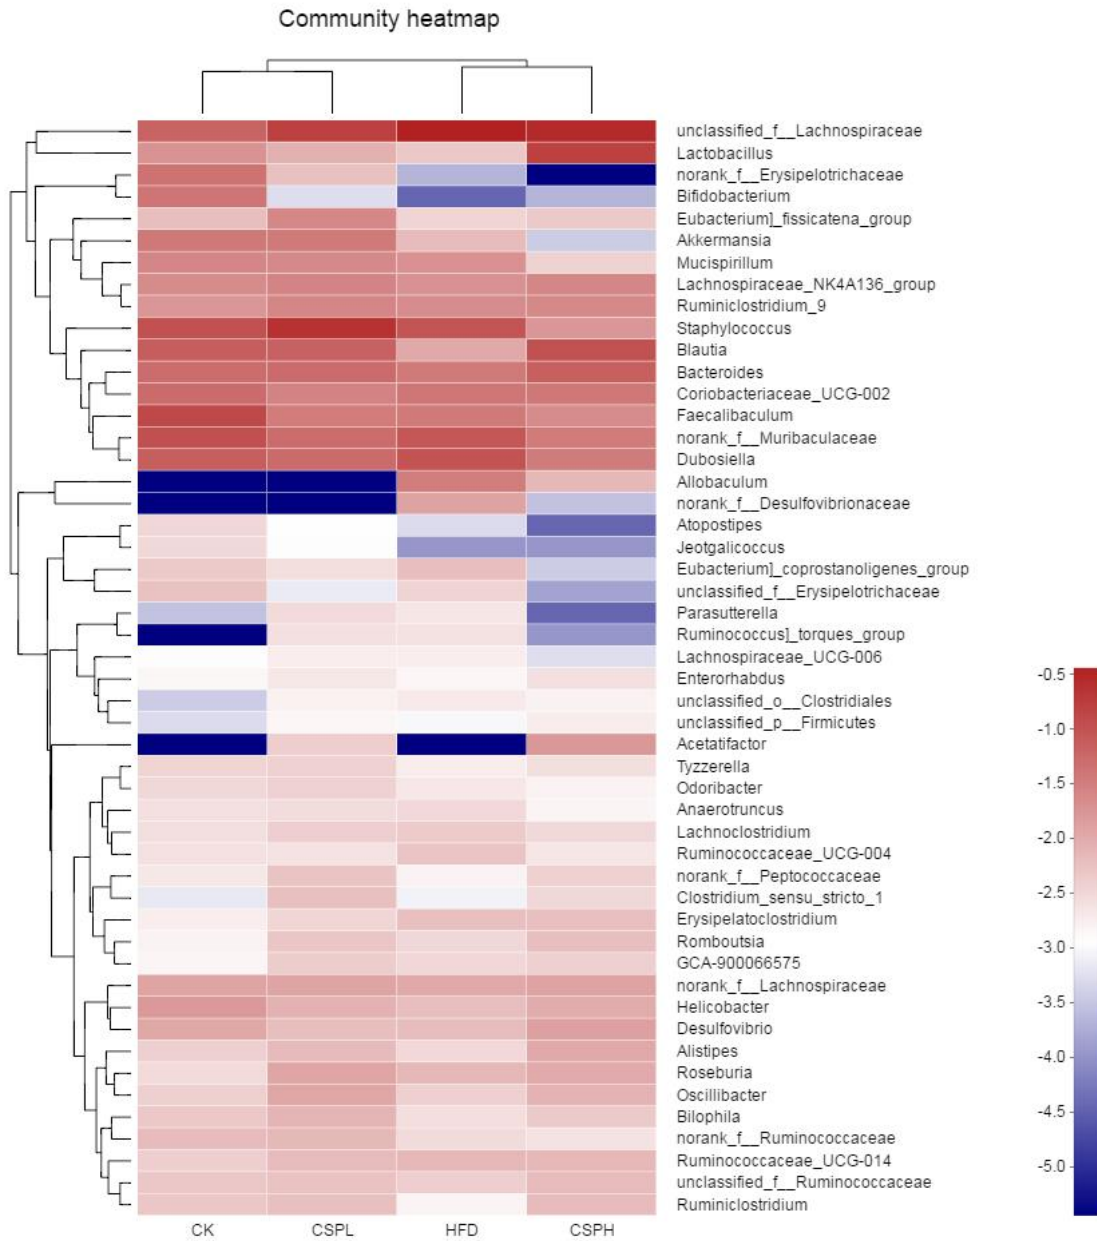

**Fig S7.** Heat map analysis of the top 35 abundance of gut microbe at genus level.

# Cladogram

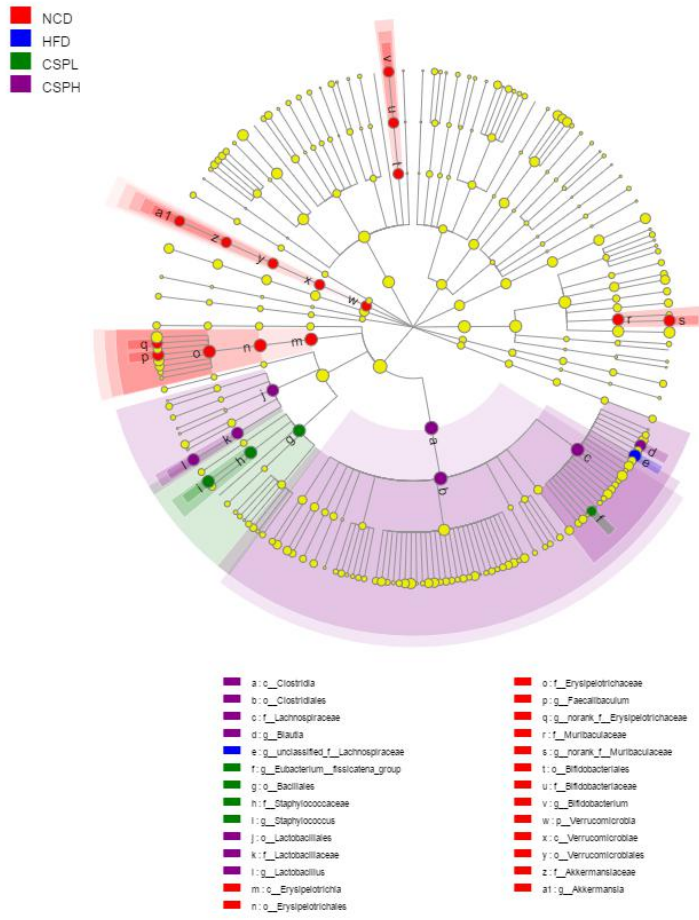

**Fig S8.** Cladogram generated from LEfSe analysis with various levels.
